# Supplementary material
Source: publisher figshare collection journal article supplement (https://gsapubs.figshare.com/ndownloader/files/31208932)
Supplement: Supplementary file 1 [file 31208932]

**Supplemental References Cited**

Alva-Valdivia, L.M., Rodríguez-Trejo, A., Vidal-Solano, J.R., Paz-Moreno, F., and Agarwal, A., 2019, Emplacement temperature resolution and age determination of Cerro Colorado tuff ring by paleomagnetic analysis, El Pinacate Volcanic Field, Sonora, Mexico: Journal of Volcanology and Geothermal Research, v. 369, p. 145–154, <https://doi.org/10.1016/j.jvolgeores.2018.11.012>.

Anders, M., Heiken, G., Eichelberger, J., Laughlin, A., and Huestis, S., 1981, Geologic and geophysical investigations of the Zuni-Bandera volcanic field, New Mexico: Los Alamos National Laboratory Report LA-8827-MS.

Anderson, R.E., and Christensen, G.C., 1989, Quaternary faults, folds, and related volcanic features of the Cedar City 1º x 2º quadrangle, Utah: Utah Geological and Mineral Survey Miscellaneous Paper 89–6, 29 p.

Anderson, R.E., and Mehnert, H.H., 1979, Reinterpretation of the history of the Hurricane fault in Utah, *in* Newman, G.W., and Good, H.D., eds., 1979 Basin and Range Symposium: Rocky Mountain Association of Geologists and Utah Geological Association, p. 145–165.

Appelt, R.M., 1998, 40Ar/39Ar geochronology and volcanic evolution of the Taos Plateau volcanic field, northern New Mexico and southern Colorado [M.S. thesis]: Socorro, New Mexico Institute of Mining and Technology, 149 p.

Armstrong, R.L., Speed, R.C., Graustein, W.C., and Young, A.Y., 1976, K-Ar dates from Arizona, Montana, Utah, and Wyoming: Isochron-West, v. 16, p. 1–6.

Bachman, G.O., and Mehnert, H.H., 1978, New K-Ar dates and the late Pliocene to Holocene geomorphic history of the central Rio Grande region, New Mexico: Geological Society of America Bulletin, v. 89, p. 283–292, [https://doi.org/10.1130/0016-7606(1978)89<283:NKDATL>2.0.CO;2](https://doi.org/10.1130/0016-7606(1978)89%3c283:NKDATL%3e2.0.CO;2).

Baldridge, W.S., Perry, F.V., and Shafiqullah, M., 1987, Late Cenozoic volcanism of the southeastern Colorado Plateau: I. Volcanic geology of the Lucero area, New Mexico: Geological Society of America Bulletin, v. 99, p. 463–570, [https://doi.org/10.1130/0016-7606(1987)99<463:LCVOTS>2.0.CO;2](https://doi.org/10.1130/0016-7606(1987)99%3c463:LCVOTS%3e2.0.CO;2).

Bernatowicz, T.J., 1981, Noble gases in ultramafic xenoliths from San Carlos, Arizona: Contributions to Mineralogy and Petrology, v. 76, p. 84–91, <https://doi.org/10.1007/BF00373687>.

Best, M.G., McKee, E.H., and Damon, P.E., 1980, Space-time-composition patterns of late Cenozoic mafic volcanism, southwestern Utah and adjoining areas: American Journal of Science, v. 280, p. 1035–1050, <https://doi.org/10.2475/ajs.280.10.1035>.

Biek, R.F., Rowley, P.D., Hayden, J.M., Hacker, D.B., Willis, G.C., Hintze, L.F., Anderson, R.E., and Brown, K.D., 2010, Geologic map of the St. George and east part of the Colver Mountains 30’ × 60’ quadrangles, Washington and Iron Counties, Utah: Utah Geological Survey Map 242DM, scale 1:100,000.

Biek, R.F., Moore, D.W., and Nealey, L.D., 2011, Geologic map of the Henrie Knolls quadrangle, Garfield, Kane, and Iron Counties, Utah: Utah Geological Survey Map 252DM, scale 1:24,000.

Biek, R.F., Rowley, P.D., Anderson, J.J., Maldonado, F., Moore, D.W., Hacker, D.B., Eaton, J.G., Hereford, R., Sable, E.G., Fikorn, H.F., and Matyjasik, B., 2015, Geologic map of the Panguitch 30’ × 60’ quadrangle, Garfield, Iron, and Kane Counties, Utah. Utah Geological Survey Map 270DM, scale 1:100,000.

Billingsley, G.H., 1994, Geologic map of the Antelope Knoll quadrangle, northern Mohave County, Arizona: U.S. Geological Survey Open-File Report 94–449, scale 1:24,000,18 p. text.

Blondes, M.S., Reiners, P.W., Ducea, M.N., Singer, B.S., and Chesley, J., 2008, Temoporal-compositional trends over short and long time-scales in basalts of the Big Pine Volcanic Field, California: Earth and Planetary Science Letters, v. 269, p. 140–154, <https://doi.org/10.1016/j.epsl.2008.02.012>.

Browne, B., Bursik, M., Deming, J., Louros, M., Martos, A., and Stine, S., 2010, Eruption chronology and petrologic reconstruction of the ca. 8500 yr B.P. eruption of Red Cones, southern Inyo chain, California: Geological Society of America Bulletin, v. 122, p. 1401–1422, <https://doi.org/10.1130/B30070.1>.

Cave, S.R., 2014, Geologic map of the Sentinel-Arlington volcanic field, western Maricopa County and eastern Yuma County, Arizona: Arizona Geological Survey Contributed Map CM-14-A, scale 1:100,000.

Champion, D.E., Cyr, A., Fierstein, J., and Hildreth, W., 2018, Monogenetic origin of Ubehebe Crater maar volcano, Death Valley, California: Paleomagnetic and stratigraphic evidence: Journal of Volcanology and Geothermal Research, v. 354, p. 67–73, <https://doi.org/10.1016/j.jvolgeores.2017.12.018>.

Channer, M.A., Ricketts, J.W., Zimmerer, M., Heizler, M., and Karlstrom, K.E., 2015, Surface uplift above the Jemez mantle anomaly in the past 4 Ma based on 40Ar/39Ar dated paleoprofiles on the Rio San Jose, New Mexico, USA: Geosphere, v. 11, p. 1384–1400, <https://doi.org/10.1130/GES01145.1>.

Condit, C.D., Crumpler, L.S., and Aubele, J.C., 1999, Lithologic, age-group, magnetopolarity and geochemical maps of the Springerville Volcanic Field, east-central Arizona, U.S. Geological Survey Miscellaneous Investigations Map I-2431, scale 1:100,000, 5 sheets, 53 p. text.

Conway, F.M., Ferrill, D.A., Hall, C.M., Morris, A.P., Stamatakos, J.A., Connor, C.B., Halliday, A.N., and Condit, C., 1997, Timing of basaltic volcanism along the Mesa Butte Fault in the San Francisco Volcanic Field, Arizona, from 40Ar/39Ar dates: Implications for longevity of cinder cone alignments: Journal of Geophysical Research, v. 102, p. 815–824, <https://doi.org/10.1029/96JB02853>.

Conway, F.M., Connor, C.B., Hill, B.E., Condit, C.D., Mullaney, K., and Hall, C.M., 1998, Recurrence rates of basaltic volcanism in SP cluster, San Francisco volcanic field, Arizona: Geology, v. 26, p. 655–658, [https://doi.org/10.1130/0091-7613(1998)026<0655:RROBVI>2.3.CO;2](https://doi.org/10.1130/0091-7613(1998)026%3c0655:RROBVI%3e2.3.CO;2).

Cousens, B.L., Henry, C.D., Harvey, B.J., Browrigg, T., Prytulak, J., and Allan, J.F., 2011, Secular variations in magmatism during a continental arc to post-arc transition: Plio-Pleistocene volcanism in the Lake Tahoe/Truckee area, northern Sierra Nevada, California: Lithos, v. 123, p. 225–242, <https://doi.org/10.1016/j.lithos.2010.09.009>.

Cousens, B., Henry, C.D., and Gupta, V., 2012, Distinct mantle sources for Pliocene-Quaternary volcanism beneath the modern Sierra Nevada and adjacent Great Basin, northern California and western Nevada, USA: Geosphere, v. 8, p. 562–580, <https://doi.org/10.1130/GES00741.1>.

Cousens, B.L., Wetmore, S., and Henry, C.D., 2013, The Plio-Quaternary Buffalo Valley volcanic field, Nevada: Post-extension, intraplate magmatism in the north-central Great Basin, USA: Journal of Volcanology and Geothermal Research, v. 268, p. 17–35, <https://doi.org/10.1016/j.jvolgeores.2013.10.006>.

Crow, R.S., Karlstrom, K.E., McIntosh, W., Peters, L., Crossey, L., and Eyster, A., 2015, A new model for Quaternary lava dams in Grand Canyon based on 40Ar/39Ar dating, basalt geochemistry, and field mapping: Geosphere, v. 11, no. 5, p. 1305–1342, <https://doi.org/10.1130/GES01128.1>.

Crumpler, L.S., 1982, Volcanism in the Mt. Taylor Region: New Mexico Geological Society Guidebook, v. 33, p. 291–298.

Damon, P.E., Shafiqullah, M., Harris, R.C., and Spence, J.E., 1996, Compilation of unpublished Arizona K-Ar dates from the University of Arizona Laboratory of Isotope Geochemistry, 1971–1991: Arizona Geological Survey Open-File Report 96–18, 53 p.

Denham, C.R., and Cox, A., 1971, Evidence that the Laschamp polarity event did not occur 13 300–13 400 years ago: Earth and Planetary Science Letters, v. 13, p. 181–190, <https://doi.org/10.1016/0012-821X(71)90122-1>.

Dickson, L.D., 1997, Volcanology and geochemistry of Pliocene and Quaternary basalts on Citadel Mountain, Lunar Crater volcanic field, Pancake Range, Nevada [M.S. thesis]: University of Nevada Las Vegas, 146 p.

Doelling, H.H., 2008, Geologic map of the Kanab 30’ × 60’ quadrangle, Kane and Washington Counties, Utah, and Coconino and Mohave Counties, Arizona: Utah Geological Survey Miscellaneous Publication 08–2DM, scale 1:100,000.

Dohrenwend, J.C., McFadden, L.D., Turrin, B.D., and Wells, S.G., 1984, K-Ar dating of the Cima volcanic field, eastern Mojave Desert, California: Late Cenozoic volcanic history and landscape evolution: Geology, v. 12, p. 163–167, [https://doi.org/10.1130/0091-7613(1984)12<163:KDOTCV>2.0.CO;2](https://doi.org/10.1130/0091-7613(1984)12%3c163:KDOTCV%3e2.0.CO;2).

Dohrenwend, J.C., Wells, S.G., and Turrin, B.D., 1986, Degradation of Quaternary cinder cones in the Cima volcanic field, Mojave Desert, California: Geological Society of America Bulletin, v. 97, p. 421–427, [https://doi.org/10.1130/0016-7606(1986)97<421:DOQCCI>2.0.CO;2](https://doi.org/10.1130/0016-7606(1986)97%3c421:DOQCCI%3e2.0.CO;2).

Downing, R.F., 2000, Imaging the mantle in southwestern Utah using geochemistry and geographic information systems [M.S. thesis]: University of Nevada Las Vegas, 128 p.

Duffield, W.A., Bacon, C.A., and Dalrymple, G.B., 1980, Late Cenozoic volcanism, geochronology, and structure of the Coso Range, Inyo County, California: Journal of Geophysical Research, v. 85, p. 2381–2404, <https://doi.org/10.1029/JB085iB05p02381>.

Duffield, W., Riggs, N.R., Kaufmann, D., Champion, D., Fenton, C.R., Forman, S., McIntosh, W.C., Hereford, R., Plescia, J., and Ort, M., 2006, Multiple constraints on the age of a Pleistocene lava dam across the Little Colorado River at Grand Falls, Arizona: Geological Society of America Bulletin, v. 118, p. 421–429, <https://doi.org/10.1130/B25814.1>.

Dunbar, N.W., 2005, Quaternary volcanism in New Mexico, in Lucas, S.G., Morgan, G.S., and Zeigler, K.E., eds., New Mexico’s Ice Ages, New Mexico Museum of Natural History and Science Bulletin No. 28, p. 95–106.

Dunbar, N.W., and Phillips, F.M., 2004, Cosmogenic 36Cl ages of lava flows in the Zuni-Bandera volcanic field, north-central New Mexico, U.S.A: New Mexico Bureau of Geology and Mineral Resources Bulletin, v. 160, p. 309–317.

Elson, M.D., Ort, M.H., Sheppard, P.R., Samples, T.L., Anderson, K.C., May, E.M., and Street, D.J., 2011, Sunset Crater Volcano, *in* Elson, M.D., ed., Sunset Crater Archaeology: The History of a Volcanic Landscape. Prehistoric Settlement in the Shadow of the Volcano: Anthropological Papers No. 37, Center for Desert Archaeology, Tucson, p. 103–129.

Fenton, C.R., and Niedermann, S., 2014, Surface exposure dating of young basalts (1–200 ka) in the San Francisco volcanic field (Arizona, USA) using cosmogenic 3He and 21Ne: Quaternary Geochronology, v. 19, p. 87–105, <https://doi.org/10.1016/j.quageo.2012.10.003>.

Fenton, C.R., Webb, R.H., Pearthree, P.A., Cerling, T.E., and Poreda, R.J., 2001, Displacement rates on the Toroweap and Hurricane faults: Implications for Quaternary downcutting in Grand Canyon: Geology, v. 29, p. 1035–1038, [https://doi.org/10.1130/0091-7613(2001)029<1035:DROTTA>2.0.CO;2](https://doi.org/10.1130/0091-7613(2001)029%3c1035:DROTTA%3e2.0.CO;2).

Fenton, C.R., Mark, D.F., Barfod, D.N., Niedermann, S., Goethals, M.M., and Stuart, F.M., 2013, 40Ar/39Ar dating of the SP and Bar Ten lava flows AZ, USA: Laying the foundation for the SPICE cosmogenic nuclide production-rate calibration project: Quaternary Geochronology, v. 18, p. 158–172, <https://doi.org/10.1016/j.quageo.2013.01.007>.

Fleck, R.J., Anderson, J.J., and Rowley, P.D., 1975, Chronology of mid-Tertiary volcanism in High Plateaus region of Utah, *in* Anderson, J.J., Rowley, P.D., Fleck, R.J., and Nairn, A.E.M., eds., Cenozoic Geology of Southwestern High Plateaus of Utah: Geological Society of America Special Paper 160, p. 53–62, <https://doi.org/10.1130/SPE160-p53>.

Fleck, R.J., Turrin, B.D., Sawyer, D.A., Warren, R.G., Champion, D.E., Hudson, M.R., and Minor, S.A., 1996, Age and character of basaltic rocks of the Yucca Mountain region, southern Nevada: Journal of Geophysical Research, v. 101, p. 8205–8227, <https://doi.org/10.1029/95JB03123>.

Geigengack, R.F., Jr., 1962, Recent volcanism near Dotsero, Colorado [M.S. thesis]: University of Colorado.

Geissman, J.W., Brown, L., Turrin, B.D., McFadden, L.D., and Harlan, S.S., 1990, Brunhes chron excursion/polarity episode recorded during the late Pleistocene, Albuquerque Volcanoes, New Mexico, USA: Geophysical Journal International, v. 102, p. 73–88, <https://doi.org/10.1111/j.1365-246X.1990.tb00531.x>.

Gilbert, C.M., Christensen, M.N., Al-Rawi, Y., and Lajoie, K.R., 1968, Structural and volcanic history of Mono Basin, California-Nevada, *in* Coats R.R., Hay, R.l., and Anderson, C.A., eds., Studies in Volcanology A Memoir in Honor of Howell Williams: Geological Society of American Memoir 116, p. 275–329.

Gile, L.J., 1987, A pedogenic chronology for Kilbourne Hole, southern New Mexico. 1. Soils in the tuff: Soil Science Society of America Journal, v. 51, p. 746–751, <https://doi.org/10.2136/sssaj1987.03615995005100030032x>.

Goff, F., Kelley, S.A., Goff, C.J., McGraw, D.J., Osburn, G.R., Lawrence, J.R., Drakos, P.G., and Skotnicki, S.J., 2019, Geologic map of the Mount Taylor volcano area, New Mexico: New Mexico Bureau of Geology and Mineral Resources, Geologic Map 80, scale 1:36,000, 1 sheet, 66 p. text.

Gutmann, J.T., and Turrin, B.D., 2006, The age of Crater Elegante, a maar in the Pinacate Volcanic field, Sonora, Mexico: Geological Society of America Abstracts with Programs, v. 38, p. 32.

Gutmann, J.T., Turrin, B.D., and Dohrenwend, J.C., 2000, Basaltic rocks form the Pinacate volcanic field yield notably young 40Ar/39Ar ages: Eos (Transactions), American Geophysical Union, v. 81, p. 33–37.

Hallett, R.B., Kyle, P.R., and McIntosh, W.C., 1997, Paleomagnetic and 40Ar/39Ar age constraints on the chronologic evolution of the Rio Puerco volcanic necks and Mesa Prieta, west-central New Mexico: Implications for transition zone magmatism: Geological Society of America Bulletin, v. 109, p. 95–106, [https://doi.org/10.1130/0016-7606(1997)109<0095:PAAAAC>2.3.CO;2](https://doi.org/10.1130/0016-7606(1997)109%3c0095:PAAAAC%3e2.3.CO;2).

Hamblin, W.K., Damon, P.E., and Bull, W.B., 1981, Estimates of vertical crustal strain rates along the western margins of the Colorado Plateau: Geology, v. 9, p. 293–298, [https://doi.org/10.1130/0091-7613(1981)9<293:EOVCSR>2.0.CO;2](https://doi.org/10.1130/0091-7613(1981)9%3c293:EOVCSR%3e2.0.CO;2).

Hanson, S.L., 2008, Age determination of lava flows at Wupatki National Monument: Western National Parks Association Project Report 07–17, 12 p.

Heizler, M.T., Perry, F.V., Crowe, B.M., Peters, L., and Appelt, R., 1999, The age of the Lathrop Wells volcanic center: An 40Ar/39Ar dating investigation: Journal of Geophysical Research, v. 104, p. 767–804, <https://doi.org/10.1029/1998JB900002>.

Hildreth, W., Fierstein, J., Champion, D., and Calvert, A., 2014, Mammoth Mountain and its mafic periphery - A late Quaternary volcanic field in eastern California: Geosphere, v. 10, p. 1315–1365, <https://doi.org/10.1130/GES01053.1>.

Hintz, A.R., 2008, Physical volcanology and hazard analysis of a young monogenetic volcanic field: Black Rock Desert, Utah [M.S. thesis]: University of South Florida, 156 p.

Hintze, L.F., Anderson, R.E., and Embree, G.F., 1994, Geologic map of the Motoqua and Gunlock quadrangles, Washington County, Utah: U.S. Geological Survey Miscellaneous Investigations Series Map I-2427, scale 1:24,000, 7 p.

Hoover, J.D., 1974, Periodic Quaternary volcanism in the Black Rock Desert, Utah: Geology Studies, v. 21, p. 3–72.

Jackson, G.W., 1990, The Toroweap Fault: one of the most active faults in Arizona: Arizona Geology: Arizona Geological Survey, v. 20, no. 3, p. 7–10.

Karlstrom, K.E., Crow, R.S., Peters, L., McIntosh, W.C., Raucci, J., Crossey, L.J., Umhoefer, P., and Dunbar, N., 2007, 40Ar/39Ar and field studies of Quaternary basalts in Grand Canyon and model for carving Grand Canyon: Quantifying the interaction of river incision and normal faulting across the western edge of the Colorado Plateau: Geological Society of America Bulletin, v. 119, p. 1283–1312, [https://doi.org/10.1130/0016-7606(2007)119[1283:AAFSOQ]2.0.CO;2](https://doi.org/10.1130/0016-7606(2007)119%5b1283:AAFSOQ%5d2.0.CO;2).

Kelley, S.A., McIntosh, W.C., Goff, F., Kempter, K.A., Wolff, J.A., Esser, R., Braschayko, S., Love, D., and Gardner, J.N., 2013, Spatial and temporal trends in pre-caldera Jemez Mountains volcanic and fault activity: Geosphere, v. 9, p. 614–646, <https://doi.org/10.1130/GES00897.1>.

Kempton, P.D., Dungan, M.A., and Blanchard, D.P., 1987, Petrology and geochemistry of xenolith-bearing alkalic basalts from the Geronimo Volcanic Field, southeast Arizona: Evidence for polybaric fractionation and implications for mantle heterogeneity, *in* Morris, E.M., and Pasteris, J.D., eds., Mantle Metasomatism and Alkaline Magmatism: Geological Society of America Special Paper 215, p. 347–370, <https://doi.org/10.1130/SPE215-p347>.

Kortemeier, W., Calvert, A., Moore, J.G., and Schweickert, R., 2018, Pleistocene volcanism and shifting shorelines at Lake Taho, California: Geosphere, v. 14, p. 812–834, <https://doi.org/10.1130/GES01551.1>.

Kudo, A.M., Kelley, V., Damon, P., and Shafiqullah, M., 1977, K-Ar ages of basalt flows at Canjilon Hill, Isleta Volcano, and the Cat Hills volcanic field, Albuquerque-Belen basin, central New Mexico: Isochron-West, v. 18, p. 15–16.

Lange, R.A., Carmichael, I.S.E., and Hall, C.M., 2000, 40Ar/39Ar chronology of the Leucite Hills, Wyoming: Eruption rates, erosion rates, and an evolving temperature structure of the underlying mantle: Earth and Planetary Science Letters, v. 174, p. 329–340, <https://doi.org/10.1016/S0012-821X(99)00267-8>.

Laughlin, A.W., and WoldeGabriel, G., 1997, Dating the Zuni-Bandera volcanic field, natural history of El Malpais National Monument: New Mexico Bureau of Mines and Mineral Resources Bulletin 156, p. 25–30.

Laughlin, A.W., Perry, F.V., Damon, P.E., Shaffiqullah, M., Harrington, C.D., Wells, S.G., and Drake, P., 1993, Geochronology of the Mount Taylor, Cebollita Mesa, and Zuni-Bandera volcanic fields, Cibola County, New Mexico: New Mexico Geology, v. 15, p. 81–92.

Laughlin, A.W., Poths, J., Healey, H.A., Reneau, S., and WoldeGabriel, G., 1994, Dating of Quaternary basalts using the cosmogenic 3He and 14C methods with implications for excess 40Ar: Geology, v. 22, p. 135–138, [https://doi.org/10.1130/0091-7613(1994)022<0135:DOQBUT>2.3.CO;2](https://doi.org/10.1130/0091-7613(1994)022%3c0135:DOQBUT%3e2.3.CO;2).

Leat, P.T., Thompson, R.N., Dickin, A.P., Morrison, M.A., and Hendry, G.L., 1989, Quaternary volcanism in northwestern Colorado: implications for the roles of asthenosphere and lithosphere in the genesis of continental basalts: Journal of Volcanology and Geothermal Research, v. 37, p. 291–310, <https://doi.org/10.1016/0377-0273(89)90085-1>.

Leavy, B.D., 1987, Surface-exposure dating of young volcanic rocks using in situ buildup of cosmogenic isotopes [Ph.D. dissertation]: Socorro, New Mexico Institute of Mining and Technology, 167 p.

Lipman, P.W., and Mehnert, H.H., 1979, The Taos Plateau volcanic field, northern Rio Grande rift, New Mexico, *in* Reiker, R.E., ed., Rio Grande Rift: Tectonics and Magmatism: American Geophysical Union Special Publication 14, p. 289–311.

Liu, T., 2003, Blind testing of rock varnish microstratigraphy as a chronometric indicator: results on late Quaternary lava flows in the Mojave Desert, California: Geomorphology, v. 53, p. 209–234, <https://doi.org/10.1016/S0169-555X(02)00331-8>.

Lund, W.R., Knudsen, T.R., and Vice, G.S., 2008, Paleoseismic reconnaissance of the Sevier fault, Kane and Garfield Counties, Utah: Utah Geological Survey Special Study 122, Paleoseismology of Utah, v. 16, 31 p.

Lutz, T.M., and Gutmann, J.T., 1995, An improved method for determining and characterizing alignments of pointlike features and its implications for the Pinacate volcanic field, Sonora, Mexico: Journal of Geophysical Research, v. 100, p. 17659–17670, <https://doi.org/10.1029/95JB01058>.

Lynch, D.J., 1978, The San Bernardino volcanic field in southeastern Arizona: New Mexico Geological Society, Guidebook 29, p. 261–268.

Lynch, D.J., Musselman, T.E., Gutmann, J.T., and Patchett, P.J., 1993, Isotopic evidence for the origin of Cenozoic volcanic rocks in the Pinacate volcanic field, northwestern Mexico: Lithos, v. 29, p. 295–302, <https://doi.org/10.1016/0024-4937(93)90023-6>.

Maldonado, F., Budahn, J.R., Peters, L., and Unruh, D.M., 2006, Geology, geochronology, and geochemistry of basaltic flows of the Cat Hills, Cat Mesa, Wind Mesa, Cerro Verde, and Mesita Negra, central New Mexico: Canadian Journal of Earth Sciences, v. 43, p. 1251–1268, <https://doi.org/10.1139/e06-018>.

McIntosh, W.C., and Cather, S.M., 1994, 40Ar/39Ar geochronology of basaltic rocks and constraints on Late Cenozoic stratigraphy and landscape development in the Red Hill-Quemado area, New Mexico, in Camberlin, R.M., Kues, B.S., Cather, S.M., Barker, J.M., and McIntosh, W.C., eds., New Mexico Geological Society Guidebook, 45th Field Conference, Mogollon Slope, West-Central New Mexico, p. 209–224.

Minier, J., Reiter, M., Shafiqullah, M., and Damon, P.E., 1988, Geothermal studies in the Quemado area, New Mexico: Geothermics, v. 17, p. 735–755, <https://doi.org/10.1016/0375-6505(88)90034-X>.

Mnich, M.E., and Condit, C.D., 2018, Basaltic magmatic mapping: A suggested methodology and the resulting petrologic and volcanic hazard implications from the Springerville Volcanic Field, east central Arizona: Journal of Volcanology and Geothermal Research, v. 366, p. 58–73, <https://doi.org/10.1016/j.jvolgeores.2018.09.009>.

Moore, R.B., and Wolfe, E.W., 1987, Geologic map of the east part of the San Francisco volcanic field, north-central Arizona: U.S. Geological Survey Map MF-1960, scale 1:50,000, 2 sheets, 46 p. text.

Morgan, P., Sass, J.H., Duffield, W., Felger, T., Fry, B.N., and Peters, L., 2004, Geothermal Resource Evaluation Program of the Eastern San Francisco Volcanic Field, Arizona: Department of Energy, Project GRED II Final Report, Agreement # DE-FC04–2002AL68298, 58 p.

Morton, J.L., Silberman, M.L., Bonham, H.F., Jr., Garside, L.J., and Noble, D.C., 1977, K-Ar ages of volcanic rocks, plutonic rocks, and ore deposits in Nevada and eastern California: determinations run under the USGS-NBMG cooperative program: Isochron-West, v. 20, p. 19–29.

Nash, W.P., 1986, Distribution, lithology, and ages of late Cenozoic volcanism on the eastern margin of the Great Basin, west-central Utah: Final Report, U.S. Department of Energy Contract DE-ACO7–80ID12079, 82 p.

Nereson, A., Stroud, J., Karlstrom, K., Heizler, M., and McIntosh, W., 2013, Dynamic topography of the western Great Plains: Geomorphic and 40Ar/39Ar evidence for mantle-driven uplift associated with the Jemez lineament of NE New Mexico and SE Colorado: Geosphere, v. 9, p. 521–545, <https://doi.org/10.1130/GES00837.1>.

Olmstead, B.W., and McIntosh, W.C., 2004, 40Ar/39Ar geochronology of the Ocate volcanic field, north-central New Mexico: New Mexico Bureau of Mines and Mineral Resources Bulletin, v. 160, p. 297–308.

O’Neill, J.M., and Mehnert, H.H., 1988, Petrology and physiographic evolution of the Ocate volcanic field, north-central New Mexico: U.S. Geological Survey Professional Paper, v. 1478A, p. 1–30, <https://doi.org/10.3133/pp1478AB>.

Onken, J., and Forman, S., 2017, Terminal Pleistocene to early Holocene volcanic eruptions at Zuni Salt Lake, west-central New Mexico, USA: Bulletin of Volcanology, v. 79, p. 10, <https://doi.org/10.1007/s00445-016-1089-1>.

Oviatt, C.G., 1991, Quaternary geology of the Black Rock Desert, Millard County, Utah: Utah Geological and Mineral Survey Special Studies 73.

Oviatt, C.G., and Nash, W.P., 1989, Late Pleistocene basaltic ash and volcanic eruptions in the Bonneville Basin, Utah: Geological Society of America Bulletin, v. 101, p. 292–303, [https://doi.org/10.1130/0016-7606(1989)101<0292:LPBAAV>2.3.CO;2](https://doi.org/10.1130/0016-7606(1989)101%3c0292:LPBAAV%3e2.3.CO;2).

Patzkowsky, S., Randall, E., Rosen, M.L., Thompson, A., Moua, P.N., Shantz, K., Pollock, M., Judge, S.A., Williams, M., and Matesich, C., 2017, New cosmogenic and VML dates and revised emplacement history of the Ice Springs volcanic field in the Black Rock Desert, Utah: Geological Society of America, Abstracts with Programs, v. 49, no. 2, <https://doi.org/10.1130/abs/2017AM-306786>.

Peate, D.W., Chen, J.H., Wasserburg, G.J., and Papanastassiou, D.A., 1996, 238U-230Th dating of a geomagnetic excursion in Quaternary basalts of the Albuquerque volcanoes field, New Mexico (USA): Geophysical Research Letters, v. 23, p. 2271–2274, <https://doi.org/10.1029/96GL02064>.

Phillips, F.M., 2003, Cosmogenic 36Cl ages of Quaternary basalt flows in the Mojave Desert, California, USA: Geomorphology, v. 53, p. 199–208, <https://doi.org/10.1016/S0169-555X(02)00328-8>.

Polyak, V.J., Dillon, J.R., Asmerom, Y., and Onac, B.P., 2020, Chronology of young basalt flows from lava tube gypsum U-series ages: Quaternary Geochronology, v. 59, p. 101083, <https://doi.org/10.1016/j.quageo.2020.101083>.

Poths, J., Perry, F.V., and Crowe, B.M., 1994, 3He exposure ages at the Lathrop Wells, NV, volcanic center: Geological Survey Circular, v. 1107, p. 255.

Reynolds, S.J., Florence, F.P., Welty, J.W., Roddy, M.S., Currier, D.A., Anderson, A.V., and Keith, S.B., 1986, Compilation of radiometric age determinations in Arizona: Arizona Bureau of Geology and Mineral Technology, Bulletin 197, 258 p.

Rasoazanamparany, C., Widom, E., Valentine, G.A., Smith, E.I., Cortés, J.A., Kuentz, D., and Johnsen, R., 2015, Origin of chemical and isotopic heterogeneity in a mafic, monogenetic volcanic Field: A case study of the Lunar Crater Volcanic Field, Nevada: Chemical Geology, v. 397, p. 76–93, <https://doi.org/10.1016/j.chemgeo.2015.01.004>.

Rittenour, T., Karlov, R.E., Broadman, E., Lapo, K., Houts, A.N., Landis, H., Anderson, K.C., Licciardi, J., Riggs, N., and Ort, M., 2015, How old are the SP and Strawberry volcanic vents and flows in the San Francisco volcanic field, Arizona? New evidence from soils, OSL dated loess and He-3 exposure dating: Geological Society of America Abstracts with Programs, v. 47, no. 7, p. 312–316.

Rodríguez-Trejo, A., Alva-Valdivia, L.M., and Vidal-Solano, J.R., 2019, Paleomagnetism and rock magnetic properties of Late Pleistocene volcanism from El Pinacate Volcanic Field, northwest Mexico: Journal of South American Earth Sciences, v. 96, p. 102368, <https://doi.org/10.1016/j.jsames.2019.102368>.

Rowley, P.D., Vice, G.S., McDonald, R.E., Anderson, J.J., Machette, M.N., Maxwell, D.J., Ekren, B., Cunningham, C.G., Steven, T.A., and Wardlaw, B.R., 2005, Interim geologic map of the Beaver 30’ × 60’ quadrangle, Beaver, Piute, Iron, and Garfield Counties, Utah: Utah Geological Survey Open-File Report 454, scale 1:100,000.

Sanchez, A., 1995, Mafic volcanism in the Colorado Plateau/Basin-and-Range transition zone, Hurricane, Utah [M.S. thesis]: University of Nevada Las Vegas, 92 p.

Sayre, W.O., Ort, M.H., and Graham, D., 1995, Capulin Volcano is approximately 59,100 years old: cosmogenic helium aging technique key to clearing up age old question: Park Science, v. 15, p. 10–11.

Scott, G.R., and Marvin, R.F., 1985, Geologic map of surficial deposits and basaltic rocks near the Rio Chama, Rio Arriba County, New Mexico: U.S. Geological Survey, Miscellaneous Field Studies Map 1759, scale 1:50,000.

Seager, W.R., Shafiqullah, M., Hawley, J.W., and Marvin, R.F., 1984, New K-Ar dates from basalts and the evolution of the southern Rio Grande Rift: Geological Society of America Bulletin, v. 95, p. 87–99, [https://doi.org/10.1130/0016-7606(1984)95<87:NKDFBA>2.0.CO;2](https://doi.org/10.1130/0016-7606(1984)95%3c87:NKDFBA%3e2.0.CO;2).

Shepard, M.K., Arvidson, R.E., Caffee, M., Finkel, R., and Harris, L., 1995, Cosmogenic exposure ages of basaltic flows: Lunar Crater volcanic field, Nevada: Geology, v. 23, p. 21–24, [https://doi.org/10.1130/0091-7613(1995)023<0021:CEAOBF>2.3.CO;2](https://doi.org/10.1130/0091-7613(1995)023%3c0021:CEAOBF%3e2.3.CO;2).

Sims, K.W.W., Ackert, R.P., Jr., Ramos, F.C., Sohn, R.A., Murrell, M.T., and DePaolo, D.J., 2007, Determining eruption ages and erosion rates of Quaternary basaltic volcanism from combined U-series disequilibria and cosmogenic exposure ages: Geology, v. 35, p. 471–474, <https://doi.org/10.1130/G23381A.1>.

Singer, B.S., Jicha, B.R., Kirby, B.T., Geissman, J.W., and Herrero-Bervera, E., 2008, 40Ar/39Ar dating links Albuquerque Volcanoes to the Pringle Falls excursion and the Geomagnetic Instability Time Scale: Earth and Planetary Science Letters, v. 267, p. 584–595, <https://doi.org/10.1016/j.epsl.2007.12.009>.

Singer, B.S., Guillou, H., Jicha, B.R., Zanella, E., and Camps, P., 2014, Refining the Quaternary Geomagnetic Instability Time Scale (GITS): Lava flow recordings of the Blake and Post-Blake excursions: Quaternary Geochronology, v. 21, p. 16–28, <https://doi.org/10.1016/j.quageo.2012.12.005>.

Stowell, S.K., 2006, Volcanology and petrogenesis of the Navajo Lake volcanic field [M.S. thesis]: University of Nevada Las Vegas, 87 p.

Streufert, R.K., Kirkham, R.M., Schroeder II, T.J., Widmann, B.L., 2009, Geologic map of the Dotsero Quadrangle, Garfield and Eagle Counties, Colorado: Description of map units, economic geology, measured sections, whole-rock analyses, and references: Colorado Geological Survey, Open File Series 08–14.

Stroud, J.R., 1997, Geochronology of the Raton-Clayton volcanic field, with implications for volcanic history and landscape evolution [M.S. thesis]: Socorro, New Mexico Institute of Mining and Technology, 102 p.

Turley, C.H., and Nash, W.P., 1980, Petrology of late Tertiary and Quaternary volcanism in western Juab and Millard Counties, Utah: Utah Geological and Mineral Survey Special Studies, 52 p.

Turrin, B.D., and Champion, D.E., 1991, 40Ar/39Ar laser fusion and K-Ar ages from Lathrop Wells, Nevada, and Cima, California: The age of the latest volcanic activity in the Yucca Mountain area: Proceedings of the 2nd Annual International Conference on High Level Radioactive Waste Management - Las Vegas, NV, USA, American Society of Chemical Engineers, p. 68–75.

Turrin, B.D., Dohrenwend, J.C., Wells, S.G., and McFadden, L.D., 1984, Geochronology and eruptive history of the Cima volcanic field, eastern Mojave Desert, California, *in* Dohrenwend, J.C., ed., Surficial Geology of the Eastern Mojave Desert, California: Geological Society of America, 1984 Annual Meeting, Field Trip 14 Guidebook, p. 116–133.

Turrin, B.D., Gutmann, J.T., and Swisher, C.C., III, 2008, A 13 ± 3 ka age determination of a tholeiite, Pinacate volcanic field, Mexico, and improved methods for 40Ar/39Ar dating of young basaltic rocks: Journal of Volcanology and Geothermal Research, v. 177, p. 848–856, <https://doi.org/10.1016/j.jvolgeores.2008.01.049>.

Ulrich, G.E., and Bailey, N.G., 1987, Geologic map of the SP Mountain part of the San Francisco volcanic field, north-central Arizona: U.S. Geological Survey Miscellaneous Field Studies Map MF-1956, scale 1:50 000, 2 sheets.

Valentine, G.A., and Cortés, J.A., 2013, Time and space variations in magmatic and phreatomagmatic eruptive processes at Easy Chair (Lunar Crater Volcanic Field, Nevada, USA): Bulletin of Volcanology, v. 75, no. 9, <https://doi.org/10.1007/s00445-013-0752-z>.

Valentine, G.A., Cortés, J.A., Widom, E., Smith, E.I., Rasoazanamparany, C., Johnsen, R., Briner, J.P., Harp, A.G., and Turrin, B., 2017, Lunar Crater volcanic field (Reveille and Pancake Ranges, Basin and Range Province, Nevada, USA): Geosphere, v. 13, p. 391–438, <https://doi.org/10.1130/GES01428.1>.

Vazquez, J.A., and Woolford, J.M., 2015, Late Pleistocene ages for the most recent volcanism and glacial-pluvial deposits at Big Pine volcanic field, California, USA, from cosmogenic 36Cl dating: Geochemistry Geophysics Geosystems, v. 16, p. 2812–2828, <https://doi.org/10.1002/2015GC005889>.

Wenrich, K.J., Billingsley, G.H., and Blackerby, B.A., 1995, Spatial migration and compositional changes of Miocene-Quaternary magmatism in the western Grand Canyon: Journal of Geophysical Research, v. 100, no. B7, p. 10,417–10,440, <https://doi.org/10.1029/95JB00373>.

Williams, W.J.W., 1999, Evolution of Quaternary intraplate mafic lavas detailed using 3He surface exposure and 40Ar/39Ar dating, and elemental and He, Sr, Nd, and Pb isotopic signatures: Potrillo volcanic field, New Mexico, U.S.A. and San Quintin volcanic field, Baja California Norte, Mexico [Ph.D. dissertation]: University of Texas El Paso, 195 p.

Williams, W.J.W., and Poths, J., 1994, The Potrillo volcanic field, southern Rio Grande rift: 3He surface exposure dates and petrogenetic considerations: New Mexico Geology, v. 17, p. 81.

Wilshire, H.G., 1992, Geologic map of the Granite Spring Quadrangle, San Bernardino County, California: U.S. Geological Survey Open-File Report 92–183, <https://doi.org/10.3133/ofr92183>.

WoldeGabriel, G., Laughlin, A.W., Dethier, D.P., and Heizler, M., 1996, Temporal and geochemical trends of lavas in White Rock Canyon and the Pajarito Plateau, Jemez volcanic field, *in* Goff, F., Kues, B.S., Rogers, M.A., McFadden, L.S., and Gardner, J.N., eds., Jemez Mountains Region, New Mexico Geological Society 47th Annual Field Conference Guidebook, p. 251–262.

Wolfe, E.W., Ulrich, G.E., Holm, R.F., Moore, R.B., and Newhall, C.G., 1987a, Geologic map of the central part of the San Francisco volcanic field, north-central Arizona: U.S. Geological Survey Miscellaneous Field Studies Map MF-1959, scale 1:50 000, 2 sheets, 86 p. text.

Wolfe, E.W., Ulrich, G.E., and Newhall, C.G., 1987b, Geologic map of the northwest part of the San Francisco volcanic field, north-central Arizona: U.S. Geological Survey Miscellaneous Field Studies Map MF-1957, scale 1:50 000, 2 sheets.

Wood, C.A., and Kienle, J., 1990, Volcanoes of North America: Cambridge University Press, Cambridge, 354 pp.

Wrucke, C.T., Bromfield, C.S., Simons, F.S., Greene, R.C., Houser, B.B., Miller, R.J., and Gray, F., 2004, Geologic map of the San Carlos Indian Reservation, Arizona: U.S. Geological Survey Geologic Investigations I-2780, scale 1:125,000, 2 sheets, 27 p. text.

Zimmerer, M.J., 2019, 40Ar/39Ar geochronology, vent migration, and hazard implications of the youngest eruptions in the Raton-Clayton volcanic field, *in* Ramos, F., Zimmerer, M.J., Zeigler, K., and Ulmer-Scholle, D., Geology of the Raton-Clayton Area, New Mexico Geological Society 70th Annual Fall Field Conference Guidebook, p. 151–160.

Zreda, M.G., Phillips, F.M., Kubik, P.W., Sharma, P., and Elmore, D., 1993, Cosmogenic 36Cl dating of a young basaltic eruption complex, Lathrop Wells, Nevada: Geology, v. 21, p. 57–60, [https://doi.org/10.1130/0091-7613(1993)021<0057:CCDOAY>2.3.CO;2](https://doi.org/10.1130/0091-7613(1993)021%3c0057:CCDOAY%3e2.3.CO;2).
